# Supplementary material for: Triazaphosphaadamantane-functionalized terpyridine metal complexes: cyclohexane oxidation in homogeneous and carbon-supported catalysis
Source: Royal Society of Chemistry journal article supplement (doi:10.1039/d2su00017b), 2022-12-02
Supplement: d2su00017b1.pdf [file d2su00017b1.pdf]

Supplementary Information

Triazaphosphaadamantane- Functionalized Terpyridine Metal Complexes: Cyclohexane Oxidation in Homogeneous and Carbon-Supported Catalysis

Ivy L. Librando,<sup>1</sup> Anup Paul,<sup>1\*</sup> Abdallah G. Mahmoud,<sup>1,2</sup> Atash V. Gurbanov,<sup>1</sup> Sónia A.C. Carabineiro,<sup>1,3\*</sup> M. Fátima C. Guedes da Silva,<sup>1,4</sup> Carlos F.G.C. Geraldes,<sup>5,6</sup> Armando J.L. Pombeiro<sup>1,7</sup>

<sup>1</sup> Centro de Química Estrutural, Institute of Molecular Sciences, Instituto Superior Técnico, Universidade de Lisboa, Av. Rovisco Pais, 1049-001 Lisboa, Portugal; ivy.librando@tecnico.ulisboa.pt (I.L.L.); anuppaul@tecnico.ulisboa.pt (A.P.); abdallah.mahmoud@tecnico.ulisboa.pt (A.G.M.); organik10@hotmail.com (A.V.G.); fatima.guedes@tecnico.ulisboa.pt (M.F.C.G.S.); pombeiro@tecnico.ulisboa.pt (A.J.L.P.)

<sup>2</sup> Department of Chemistry, Faculty of Science, Helwan University, Ain Helwan, Cairo 11795, Egypt

<sup>3</sup> LAQV-REQUIMTE, Department of Chemistry, NOVA School of Science and Technology, Universidade NOVA de Lisboa, 2829-516 Caparica, Portugal

<sup>4</sup> Departamento de Engenharia Química, Instituto Superior Técnico, Universidade de Lisboa, Av. Rovisco Pais, 1049-001 Lisboa, Portugal

<sup>5</sup> Department of Life Sciences, Faculty of Science and Technology, Calçada Martim de Freitas, 3000-393 Coimbra, Portugal; geraldes@uc.pt

<sup>6</sup> Coimbra Chemistry Center, University of Coimbra, Rua Larga Largo D. Dinis, 3004-535 Coimbra, Portugal

<sup>7</sup> Peoples' Friendship University of Russia (RUDN University), Research Institute of Chemistry, 6 Miklukho-Maklaya Street, Moscow, 117198, Russian Federation

\*Correspondence: anuppaul@tecnico.ulisboa.pt (A.P.), sonia.carabineiro@fct.unl.pt (S.A.C.C.)

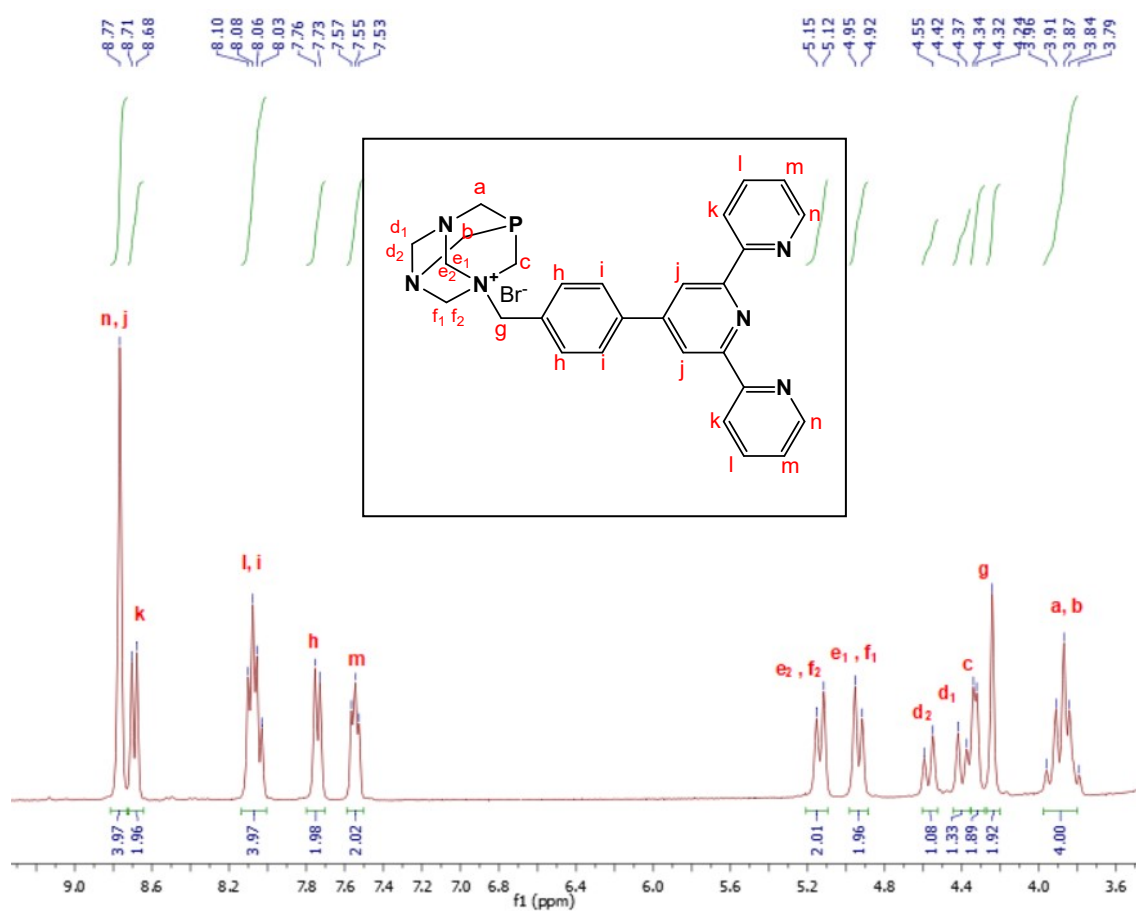

**Figure S1.** <sup>1</sup>H NMR spectrum of (p-tpy-C<sub>6</sub>H<sub>4</sub>-CH<sub>2</sub>-PTA)Br (PTA-Bztpy bromide) in DMSO-d<sub>6</sub> (300 MHz).

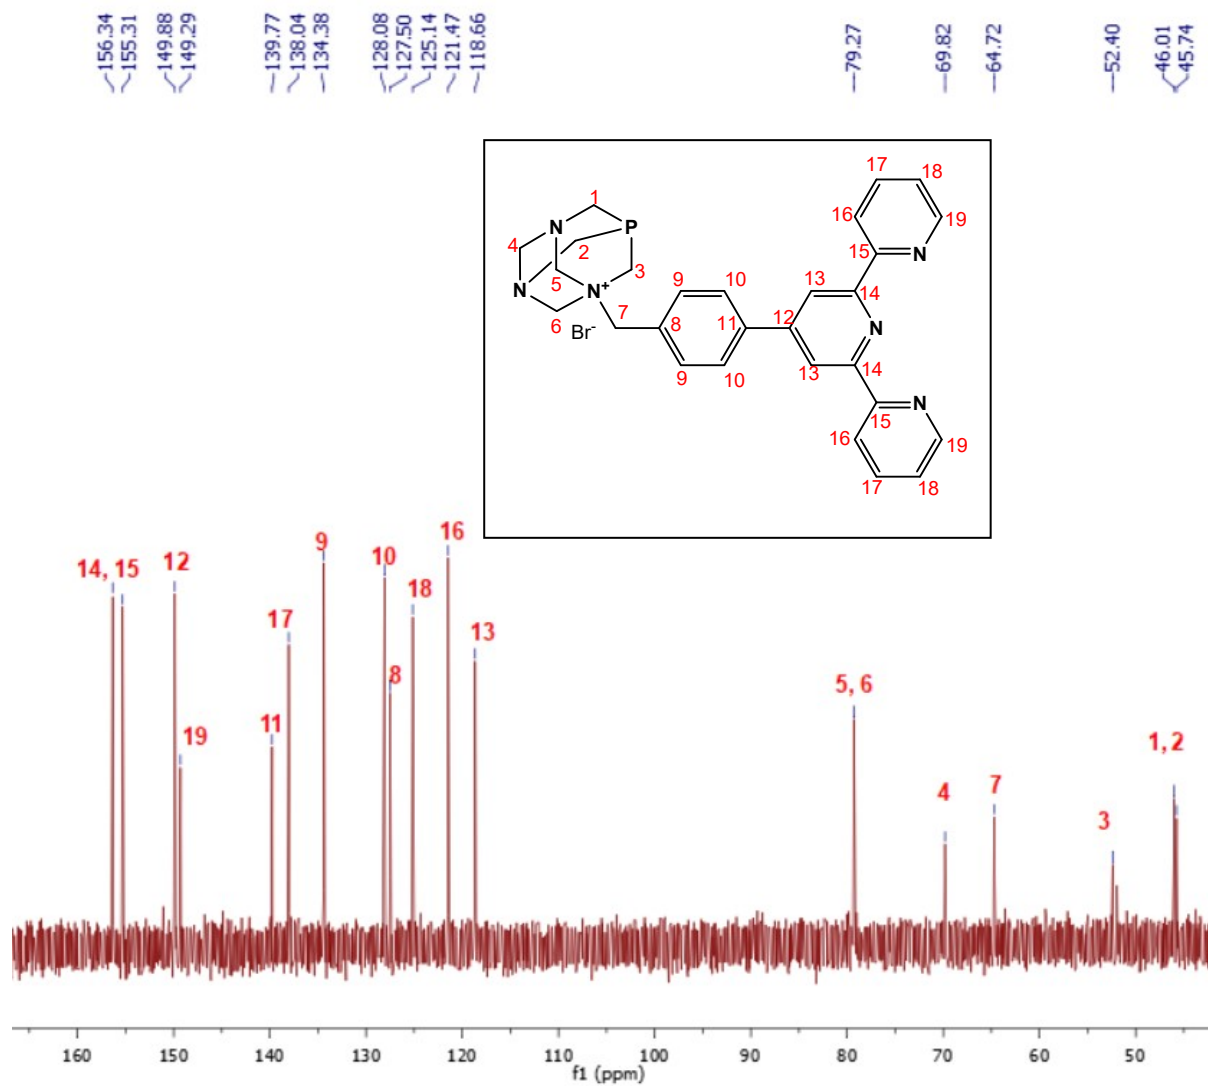

**Figure S2.** <sup>13</sup>C NMR spectrum of (p-tpy-C<sub>6</sub>H<sub>4</sub>-CH<sub>2</sub>-PTA)Br (PTA-Bztpy bromide) in DMSO-*d*<sub>6</sub> (300 MHz).

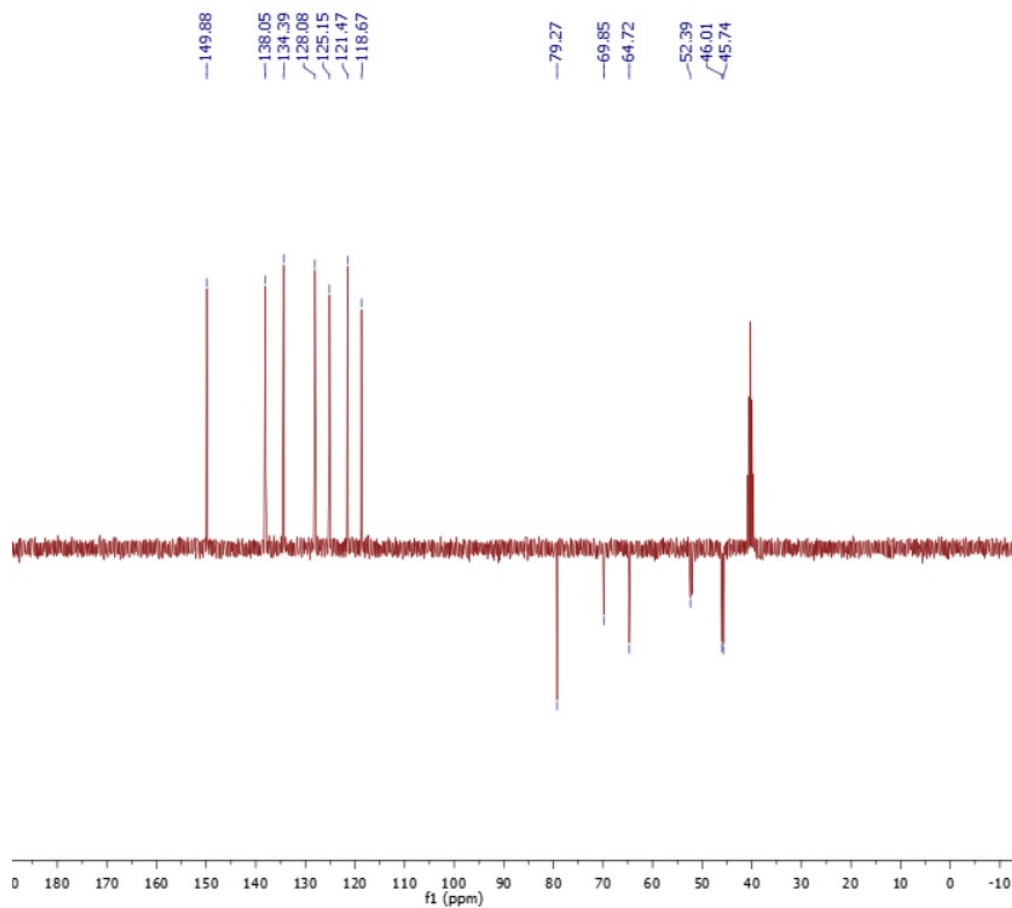

**Figure S3.** DEPT NMR spectrum of (*p*-tpy-C<sub>6</sub>H<sub>4</sub>-CH<sub>2</sub>-PTA)Br (PTA-Bztpy bromide) in DMSO-*d*<sub>6</sub> (300 MHz).

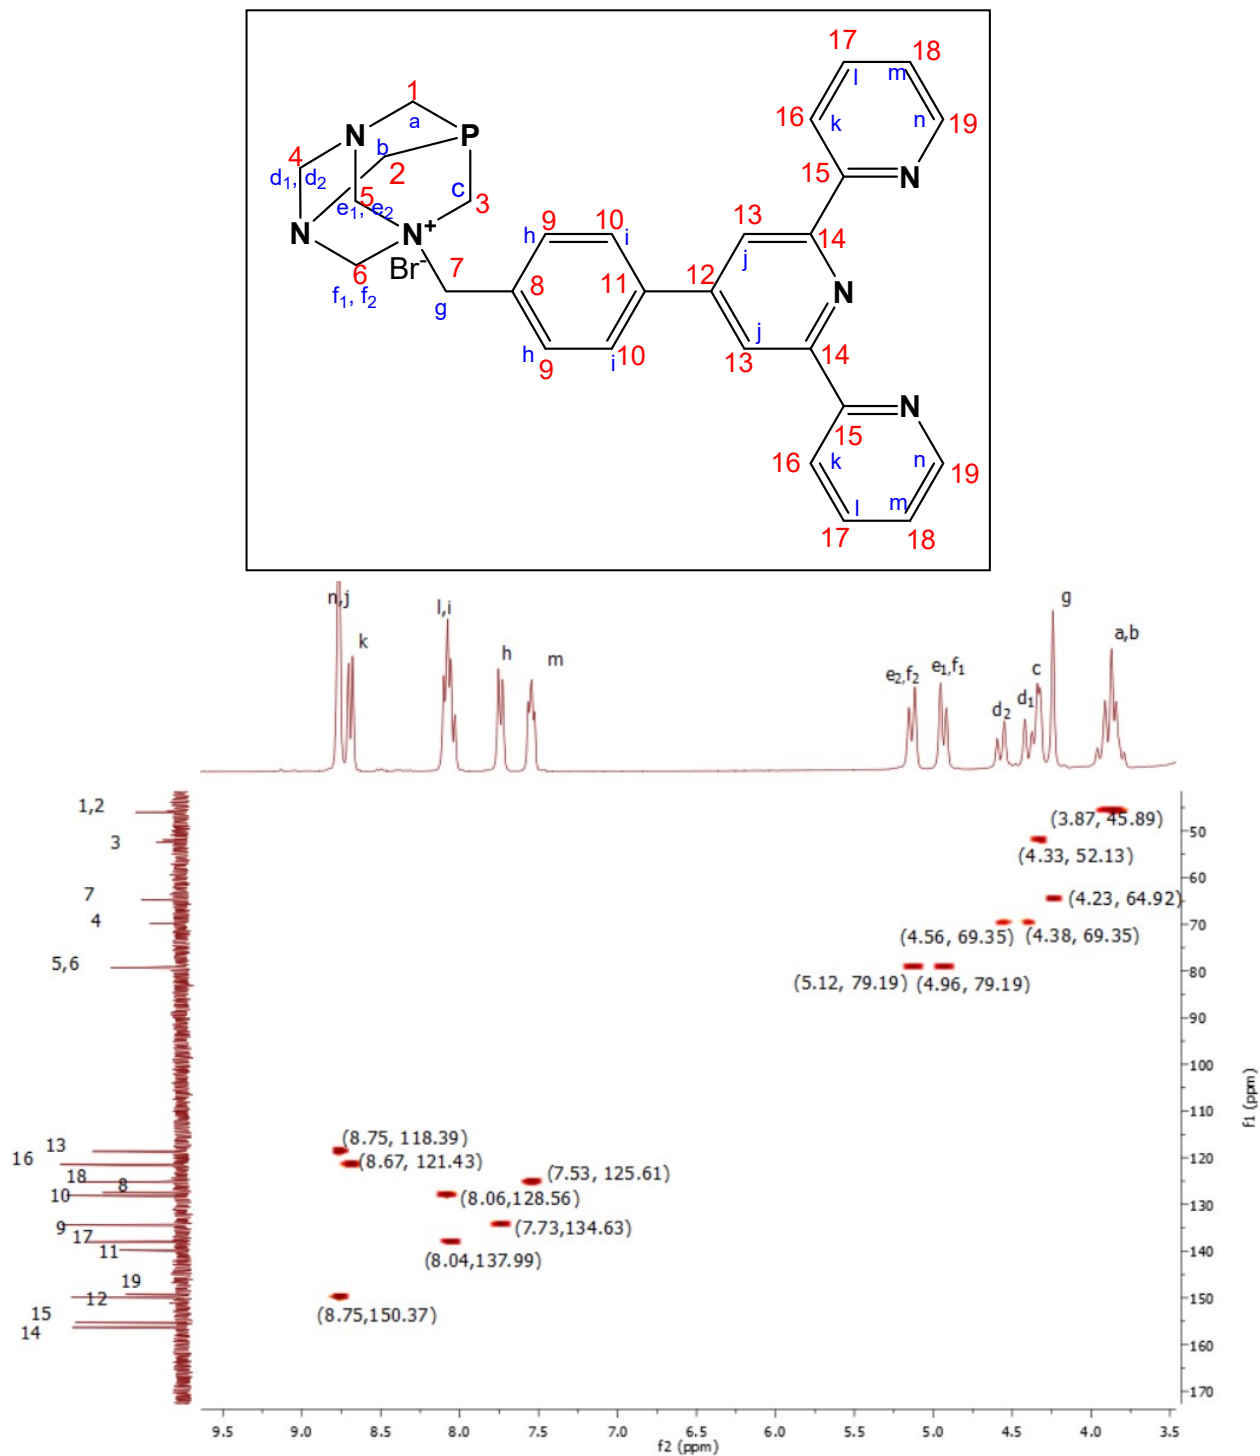

Figure S4. HSQC spectrum of (p-tpy-C<sub>6</sub>H<sub>4</sub>-CH<sub>2</sub>-PTA)Br (PTA-Bztpy bromide) in DMSO-*d*<sub>6</sub> (300 MHz).

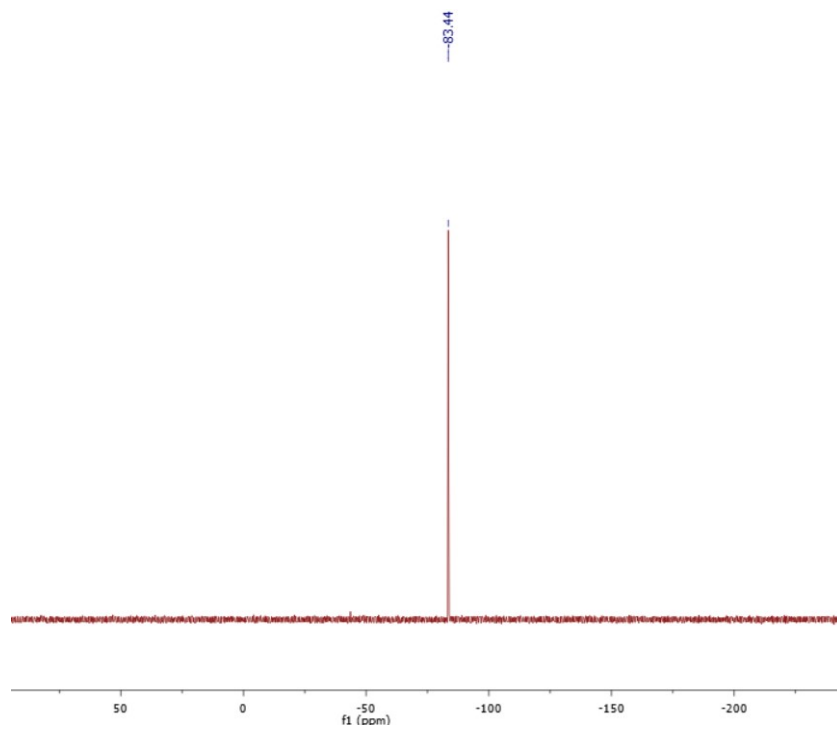

**Figure S5.**  $^{31}\text{P}$  NMR spectrum of (*p*-tpy- $\text{C}_6\text{H}_4\text{-CH}_2\text{-PTA}$ )Br (PTA-Bztpy bromide) in  $\text{DMSO-}d_6$  (300 MHz).

### ESI(-)

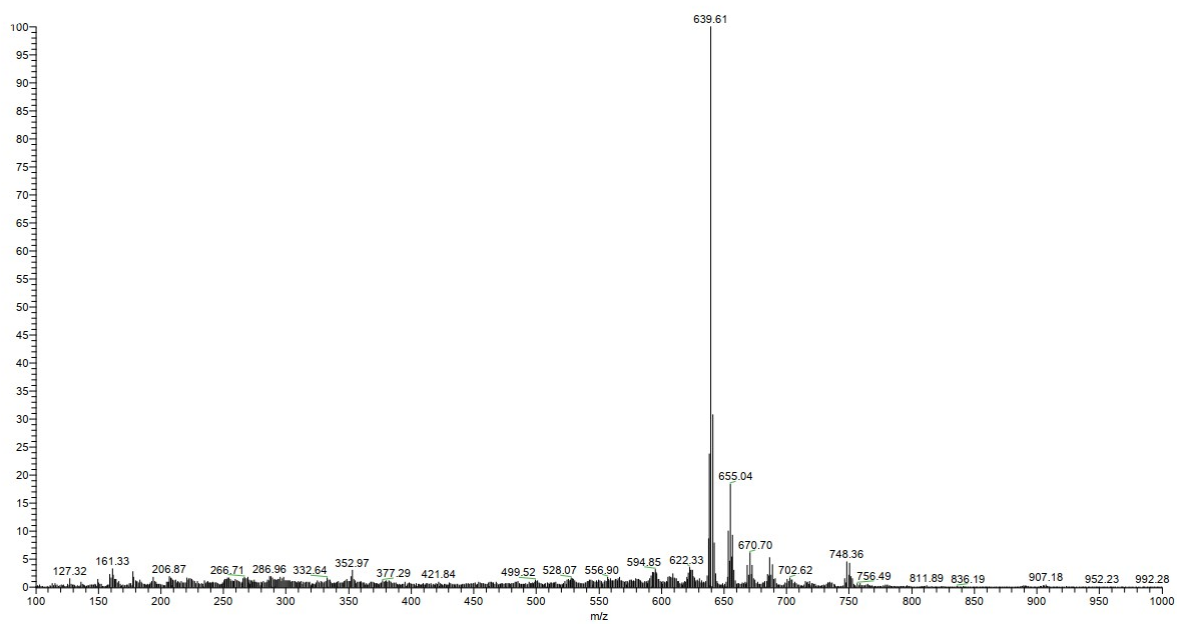

### ESI(+)

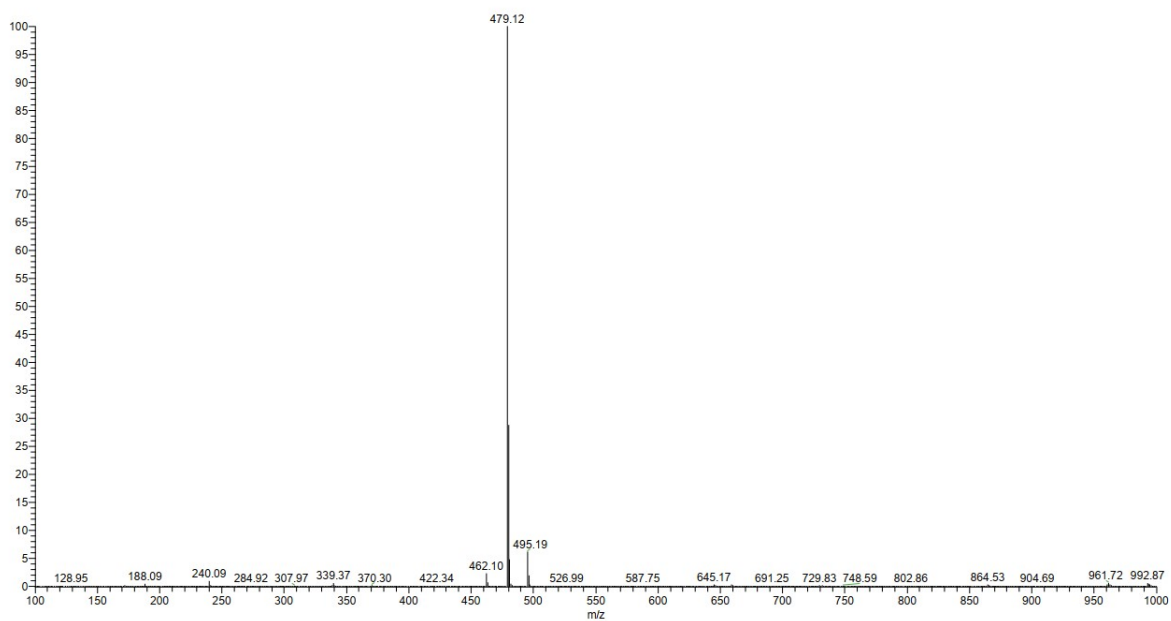

**Figure S6.** ESI-MS spectra of (*p*-tpy-C<sub>6</sub>H<sub>4</sub>-CH<sub>2</sub>-PTA)Br (PTA-Bztpy bromide)

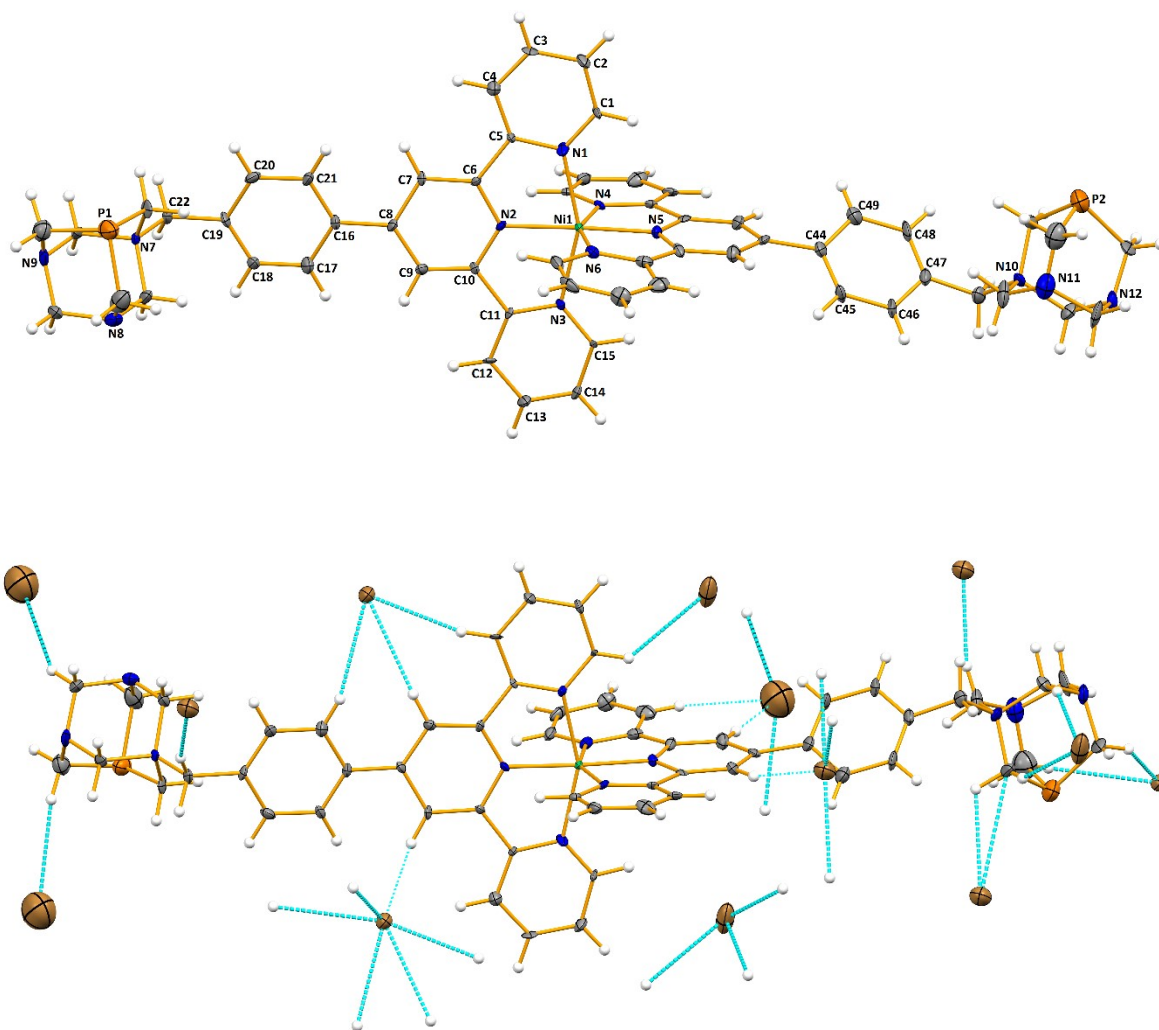

**Figure S7.** Crystal structure of complex **2**. Top: ellipsoid plot (drawn at 30% probability level) with partial atom labelling scheme; bromide counter anions were omitted for clarity. Bottom: extensive H...Br interactions (represented in dashed cyan colour)

### ESI(+)

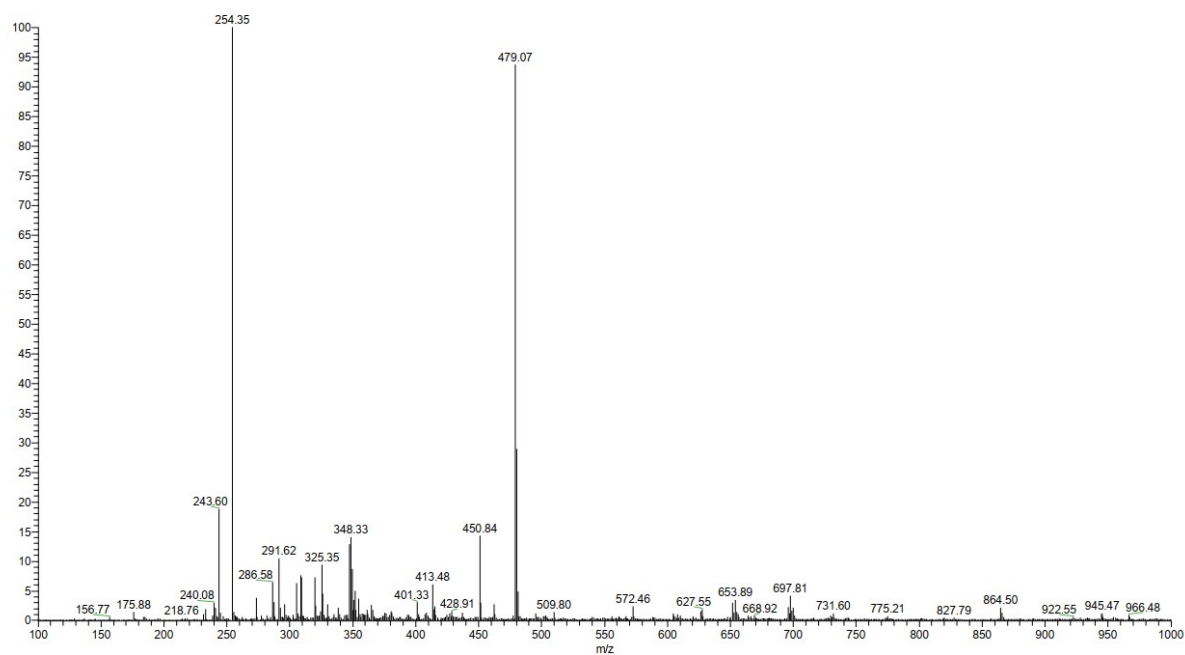

Figure S8. ESI(+)-MS spectrum of complex 1.

### ESI(+)

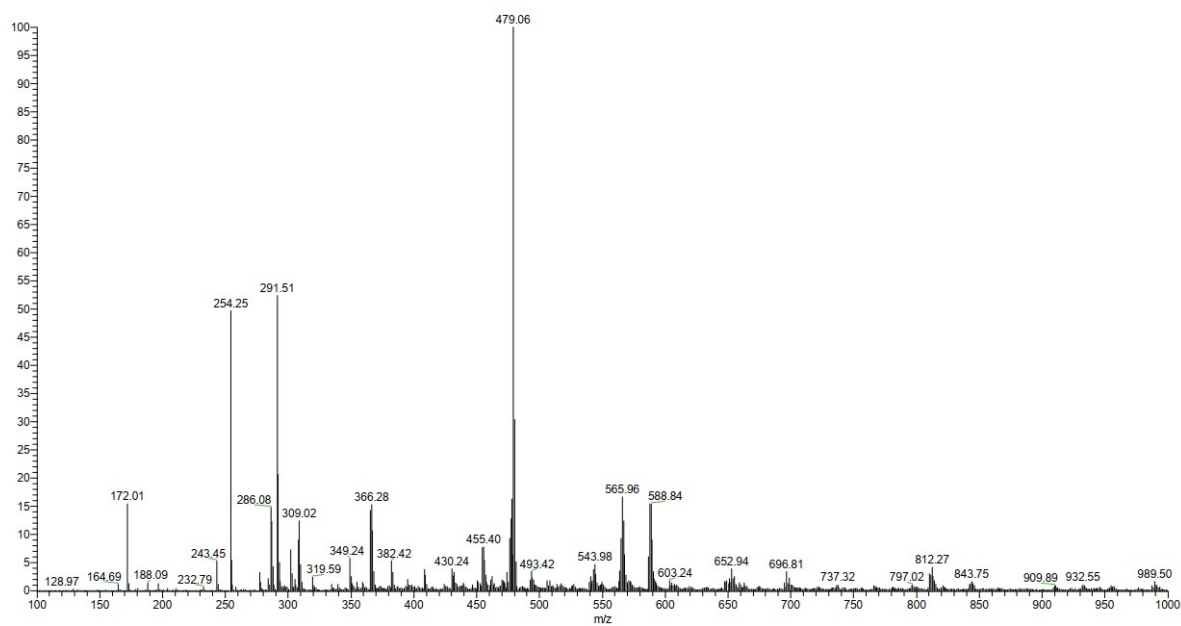

Figure S9. ESI(+)-MS spectrum of complex 2.



ESI(+)

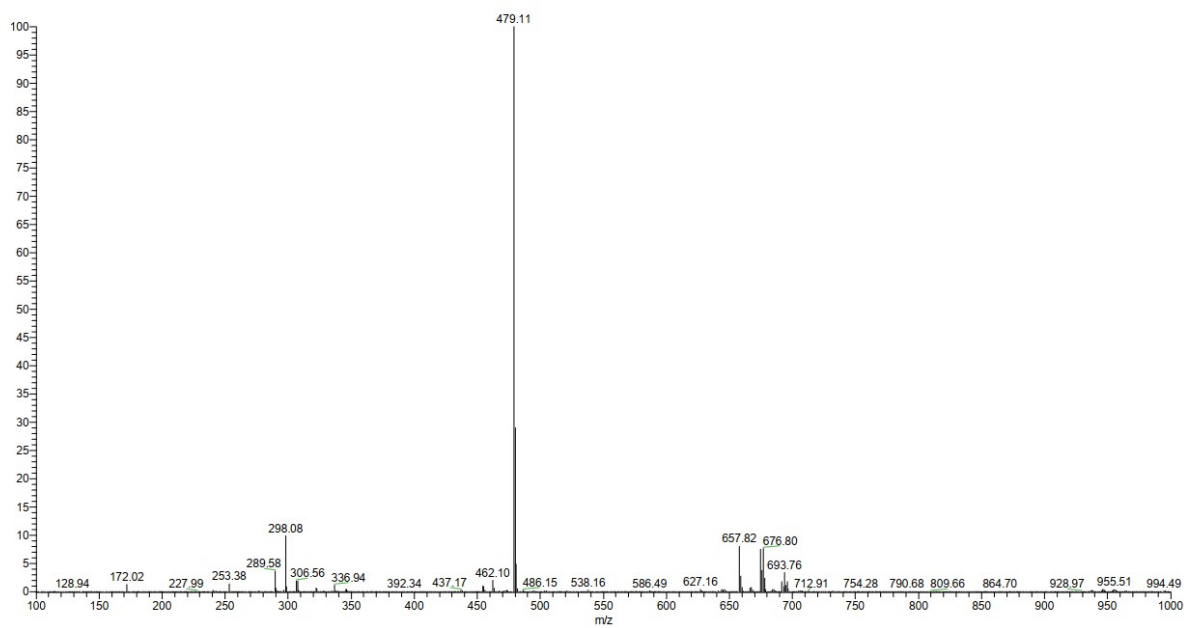

Figure S10. ESI(+)-MS spectrum of complex 3.

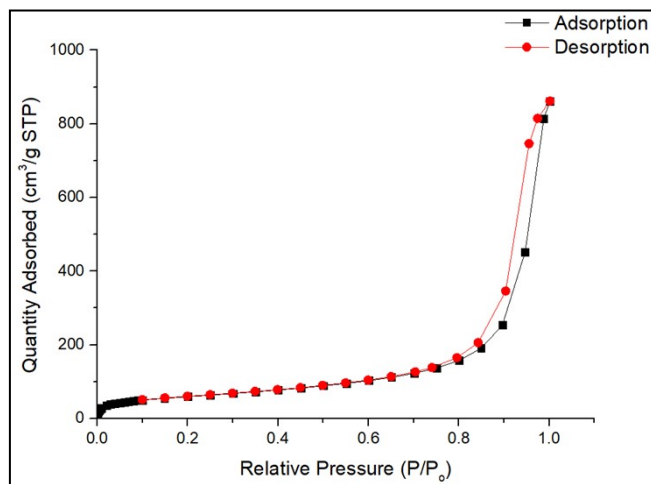

Figure S11.  $N_2$  adsorption-desorption isotherm (77 K) of 3-CNT-ox-Na.

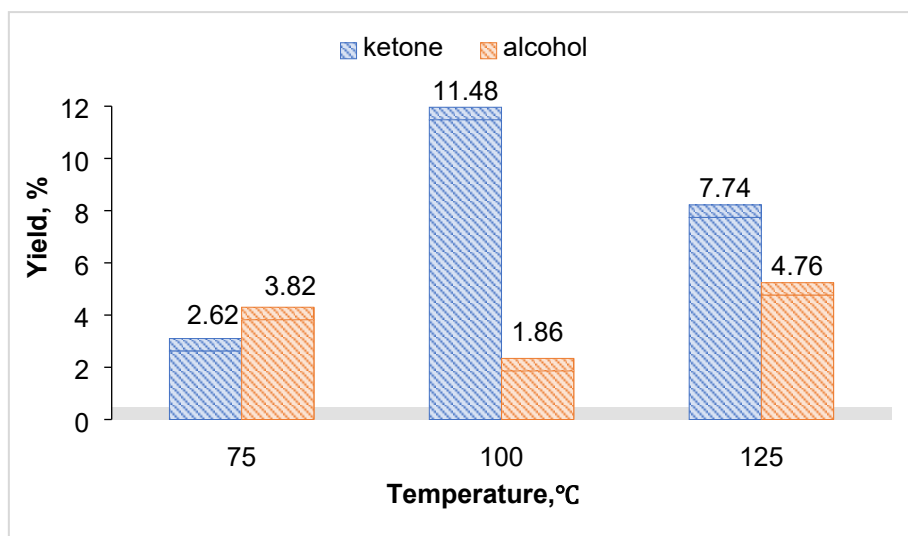

**Figure S12.** Effect of reaction temperature in the KA oil yield using complex **3** (3 mol % relative to the substrate) as catalyst. Reaction conditions: cyclohexane (5.0 mmol), 70% aqueous TBHP (10 mmol), 2 h, MW (30 W), 2 mL MeCN.

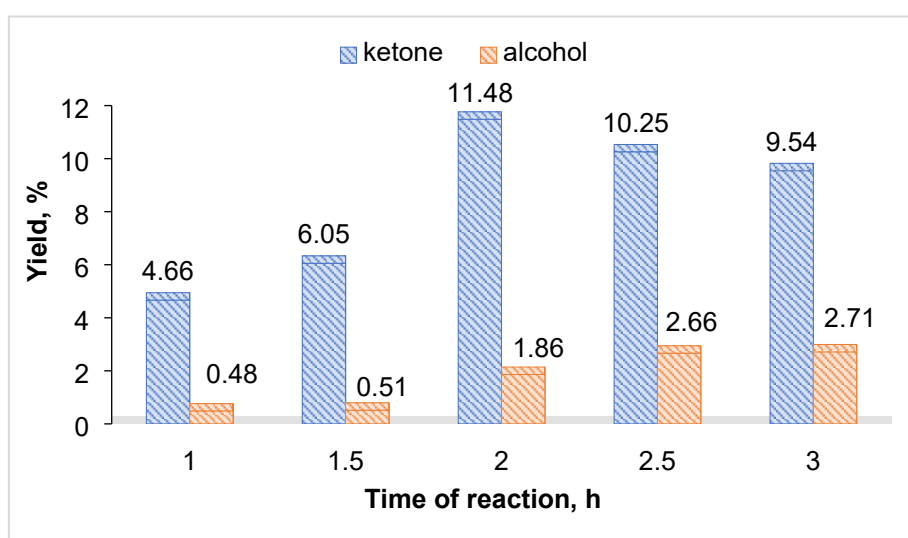

**Figure S13.** Effect of reaction time in the KA oil yield using complex **3** (3 mol % relative to the substrate) catalyst. Reaction conditions: cyclohexane (5.0 mmol), 70% aqueous TBHP (10 mmol), MW (30 W, 100°C), 2 mL MeCN.

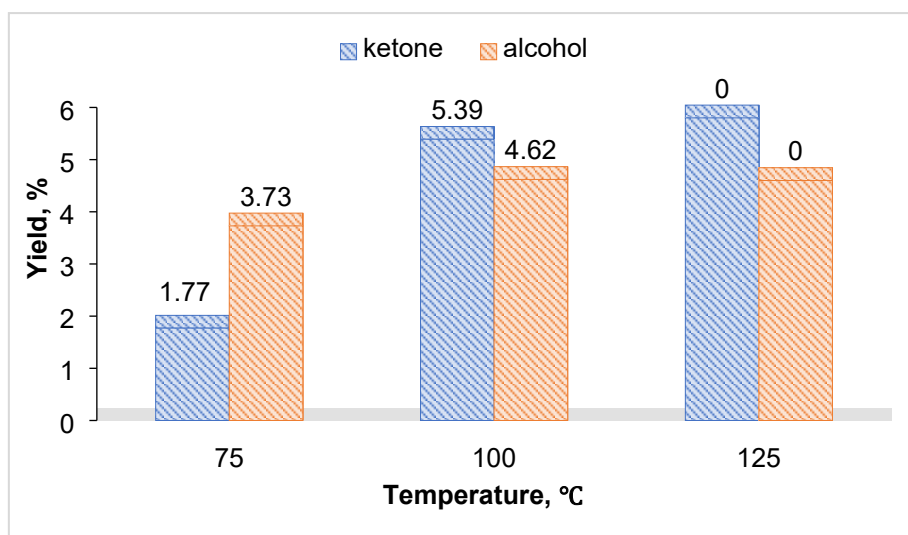

**Figure S14.** Effect of temperature in the KA oil yield . Reaction conditions: **3**-CNT-ox-Na as catalyst (0.5 mol % relative to substrate), cyclohexane (5.0 mmol), 70% aqueous TBHP (10 mmol), 2 h, MW (30 W), 2 mL MeCN.

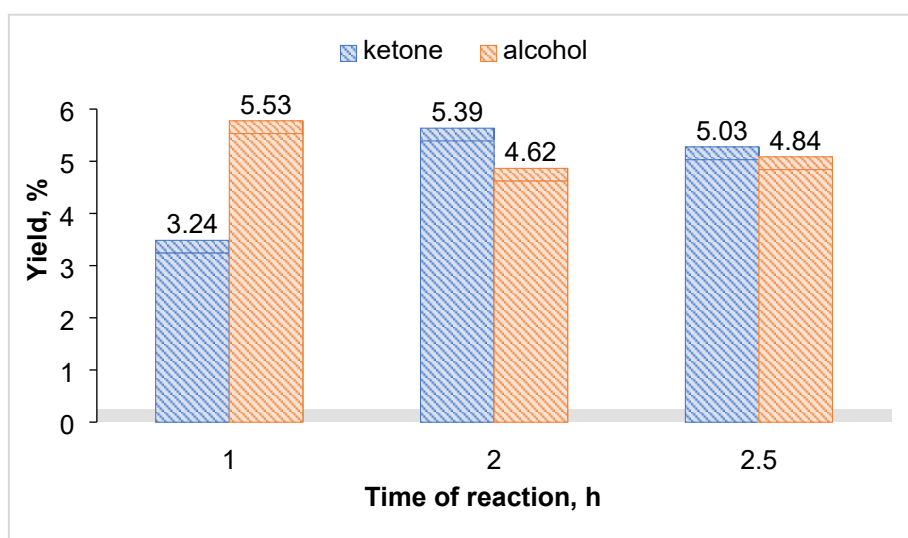

**Figure S15.** Effect of reaction time in the KA oil yield using **3**-CNT-ox-Na as catalyst (0.5 mol % relative to the substrate). Reaction conditions: cyclohexane (5.0 mmol), 70% aqueous TBHP (10 mmol), MW (30 W, 100°C), 2 mL MeCN.

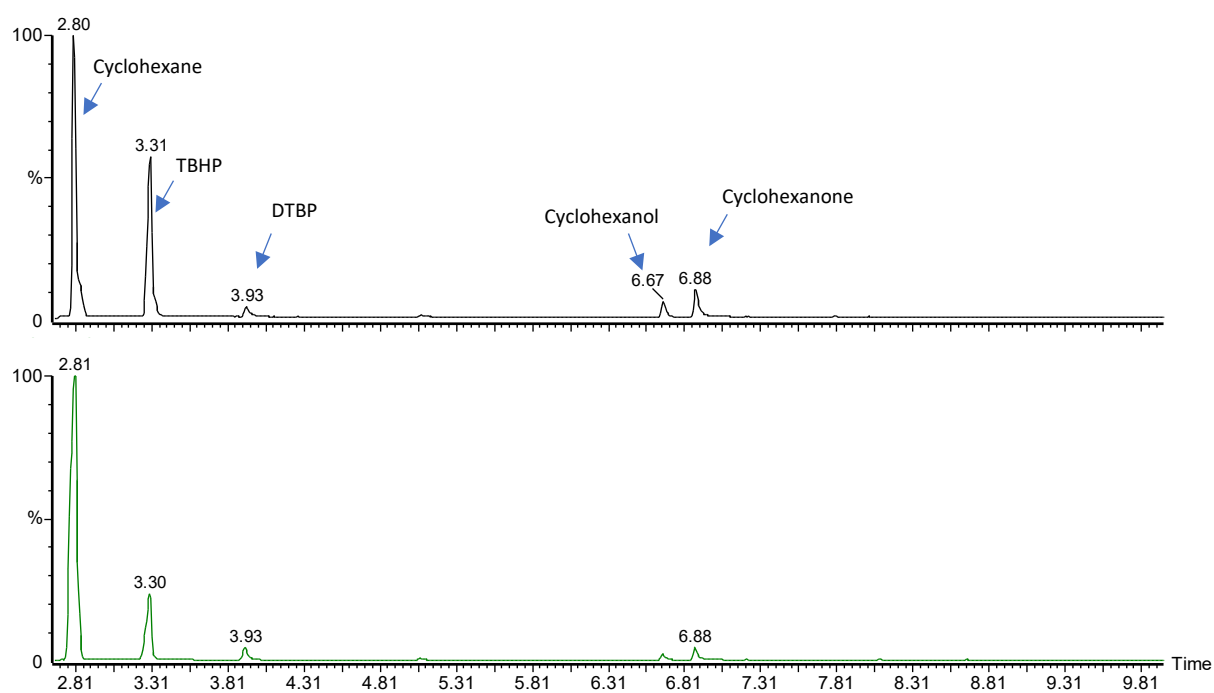

**Figure S16.** Chromatograms obtained at the end of cyclohexane oxidation reaction for: **3**-CNT-ox-Na (top) and homogeneous complex **3** (bottom).

**Table S1.** Crystal data and structure refinement details for complex **2**.

|                                        |                               |
|----------------------------------------|-------------------------------|
| Formula                                | $C_{56}H_{56}Br_4N_{12}NiP_2$ |
| Mol.wt                                 | 1337.41                       |
| Cryst. Syst.                           | Triclinic                     |
| Space group                            | P-1                           |
| Temperature (K)                        | 150(2)                        |
| a (Å)                                  | 8.7950(3)                     |
| b (Å)                                  | 16.3840(5)                    |
| c (Å)                                  | 22.2853(7)                    |
| $\alpha$ , °                           | 88.312 (2)                    |
| $\beta$ , °                            | 80.934(3)                     |
| $\gamma$ , °                           | 85.706(3)                     |
| V (Å <sup>3</sup> )                    | 3161.7(3)                     |
| Z                                      | 2                             |
| D <sub>calc</sub> (g/cm <sup>3</sup> ) | 1.405                         |
| F000                                   | 1348                          |
| $\mu$ (mm <sup>-1</sup> )              | 2.9229                        |
| Refl. measured                         | 365649                        |

|                            |        |
|----------------------------|--------|
| Independent refl.          | 12654  |
| Refl.with $I > 2\sigma(I)$ | 5318   |
| No. parameters             | 676    |
| Rint                       | 0.1287 |
| R(F) ( $I \geq 2$ )        | 0.3370 |
| wR ( $F^2$ ) (all data)    | 0.4089 |
| GOF ( $F^2$ )              | 1.145  |

**Table S2.** Characterization of supports by N<sub>2</sub> adsorption analysis at -196 °C.

| Carbon support | S <sub>BET</sub> , m <sup>2</sup> g <sup>-1</sup> | Pore volume, cm <sup>3</sup> g <sup>-1</sup> | Pore size, nm |
|----------------|---------------------------------------------------|----------------------------------------------|---------------|
| AC             | 866                                               | 0.45                                         | 5.2           |
| AC-ox          | 724                                               | 0.31                                         | 4.6           |
| AC-ox-Na       | 477                                               | 0.18                                         | 4.7           |
| CNT            | 302                                               | 2.85                                         | 30.3          |
| CNT-ox         | 301                                               | 1.62                                         | 19.0          |
| CNT-ox-Na      | 261                                               | 1.21                                         | 16.5          |

**Table S3.** Amount of Manganese (% wt) loaded onto the carbon supports used in this study.<sup>a</sup>

| Carbon material | Mn (wt %) |
|-----------------|-----------|
| AC              | 0.07      |
| AC-ox           | 2.85      |
| AC-ox-Na        | 3.76      |
| CNT             | 2.88      |
| CNT-ox          | 0.78      |
| CNT-ox-Na       | 2.91      |

<sup>a</sup> Results obtained from ICP-AES analysis.

**Table S4.** Selected data of the KA oil yield before and after PPh<sub>3</sub> treatment.

| Catalyst           | Solvent                       | Before PPh <sub>3</sub> treatment |     |       |     | After PPh <sub>3</sub> treatment |      |       |     |
|--------------------|-------------------------------|-----------------------------------|-----|-------|-----|----------------------------------|------|-------|-----|
|                    |                               | Yield (%) <sup>b</sup>            |     |       | K/A | Yield (%) <sup>b</sup>           |      |       | K/A |
|                    |                               | K                                 | A   | Total |     | K                                | A    | Total |     |
| <b>3-CNT-ox-Na</b> | MeCN:H <sub>2</sub> O(3:1v/v) | 15.2                              | 5.7 | 20.9  | 2.7 | 13.8                             | 11.4 | 25.2  | 1.2 |
| <b>3-CNT-ox-Na</b> | MeCN:H <sub>2</sub> O(1:1v/v) | 15.0                              | 8.4 | 23.4  | 1.8 | 16.1                             | 13.6 | 29.6  | 1.2 |

<sup>a</sup> Reaction conditions: cyclohexane (5.0 mmol), 70% aqueous TBHP (10 mmol), CH<sub>3</sub>NO<sub>2</sub> (100 μL), 0.5 mol % catalyst, 2 h, MW (30 W), 100 °C, 2 mL solvent. <sup>b</sup> Molar yields based on substrate determined by GC analysis, i.e., moles of products (K + A) per 100 mol of cyclohexane; K= cyclohexanone, A= cyclohexanol. <sup>c</sup> Ratio between the molar concentrations of K and A

**Table S5.** Selected data on KA oil yield and corresponding selectivity values.

| Catalyst                       | Solvent                       | Yield, % <sup>b</sup> |      |       | Selectivity, % <sup>c</sup> |      |
|--------------------------------|-------------------------------|-----------------------|------|-------|-----------------------------|------|
|                                |                               | K                     | A    | Total | K                           | A    |
| <b>3 (Mn)</b>                  | MeCN                          | 11.48                 | 1.86 | 13.34 | 86.1                        | 13.9 |
| <b>3 (Mn)</b>                  | MeCN: acetone (1:1v/v)        | 5.00                  | 3.23 | 8.23  | 60.8                        | 39.2 |
| <b>3 (Mn)</b>                  | MeCN:H <sub>2</sub> O(1:1v/v) | 11.75                 | 9.32 | 21.07 | 55.8                        | 44.2 |
| <b>3-CNT-ox-Na<sup>d</sup></b> | MeCN                          | 5.39                  | 4.62 | 10.01 | 53.8                        | 46.2 |
| <b>3-CNT-ox-Na<sup>d</sup></b> | MeCN: acetone (1:1v/v)        | 5.56                  | 4.69 | 10.3  | 54.2                        | 45.8 |
| <b>3-CNT-ox-Na<sup>d</sup></b> | MeCN:H <sub>2</sub> O(1:1v/v) | 16.06                 | 13.6 | 29.6  | 54.2                        | 45.8 |

<sup>a</sup> Reaction conditions: cyclohexane (5.0 mmol), 70% aqueous TBHP (10 mmol), CH<sub>3</sub>NO<sub>2</sub> (100 μL), 100 °C, MW (2 h, 30 W), 3 mol % catalyst loading, 2 mL solvent. <sup>b</sup> Molar yields based on substrate determined by GC analysis (after PPh<sub>3</sub> treatment), i.e., moles of products (K + A) per 100 mol of cyclohexane; K= cyclohexanone, A= cyclohexanol. <sup>c</sup> Moles of desired product per mol of converted cyclohexane. <sup>d</sup> 0.5 mol % catalyst loading.
